# Supplementary material
Source: PubMed Central journal article supplement (PMC5541208)
Supplement: AEM.01144-17_zam999118001s1.pdf [file AEM.01144-17_zam999118001s1.pdf]

## **Supplemental results**

### **Bacterial culturing**

Total counts were similar on plates incubated aerobically and anaerobically and but there was considerable variation between samples with counts ranging from lows of  $10^7$  bacteria/ml sample to highs of  $10^{11}$ .

The selective culturing method indicated that more than 60% of the samples tested contained coliform bacteria, with a further 20% containing detectable *Staphylococcus*. The likelihood of culturing potentially pathogenic bacteria was the same in samples from trained and untrained producers.

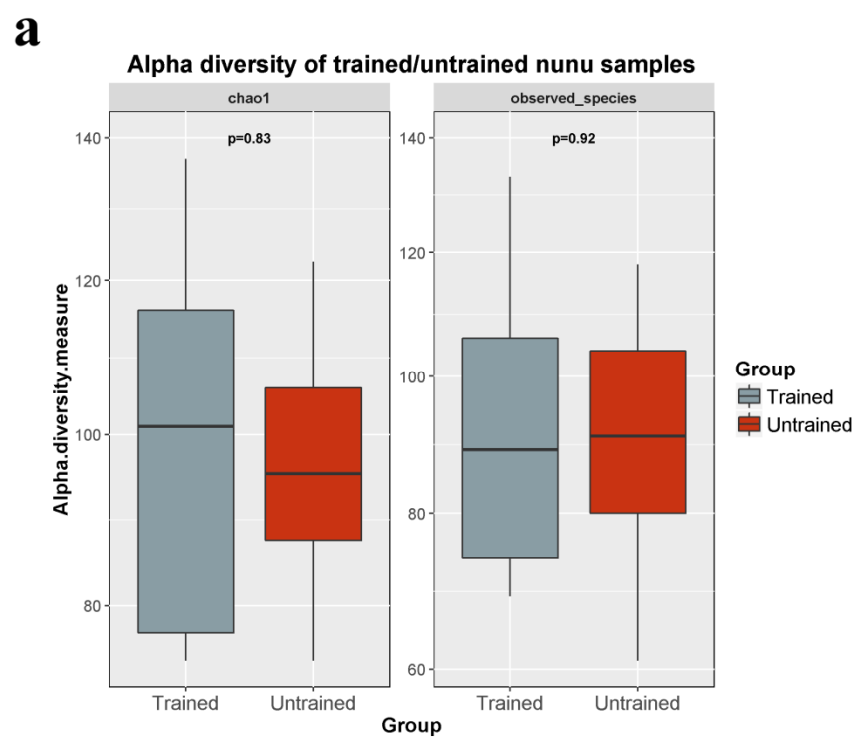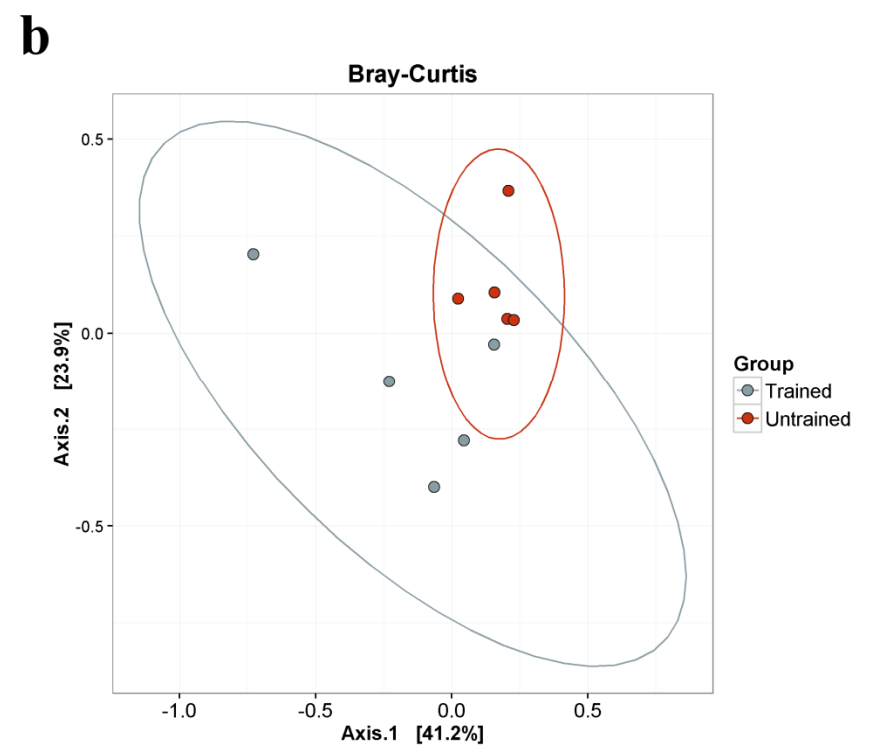

**Figure S1. (A) Box plots showing the alpha diversity of nunu samples. (B) PCoA plot showing the beta diversity of nunu samples.**

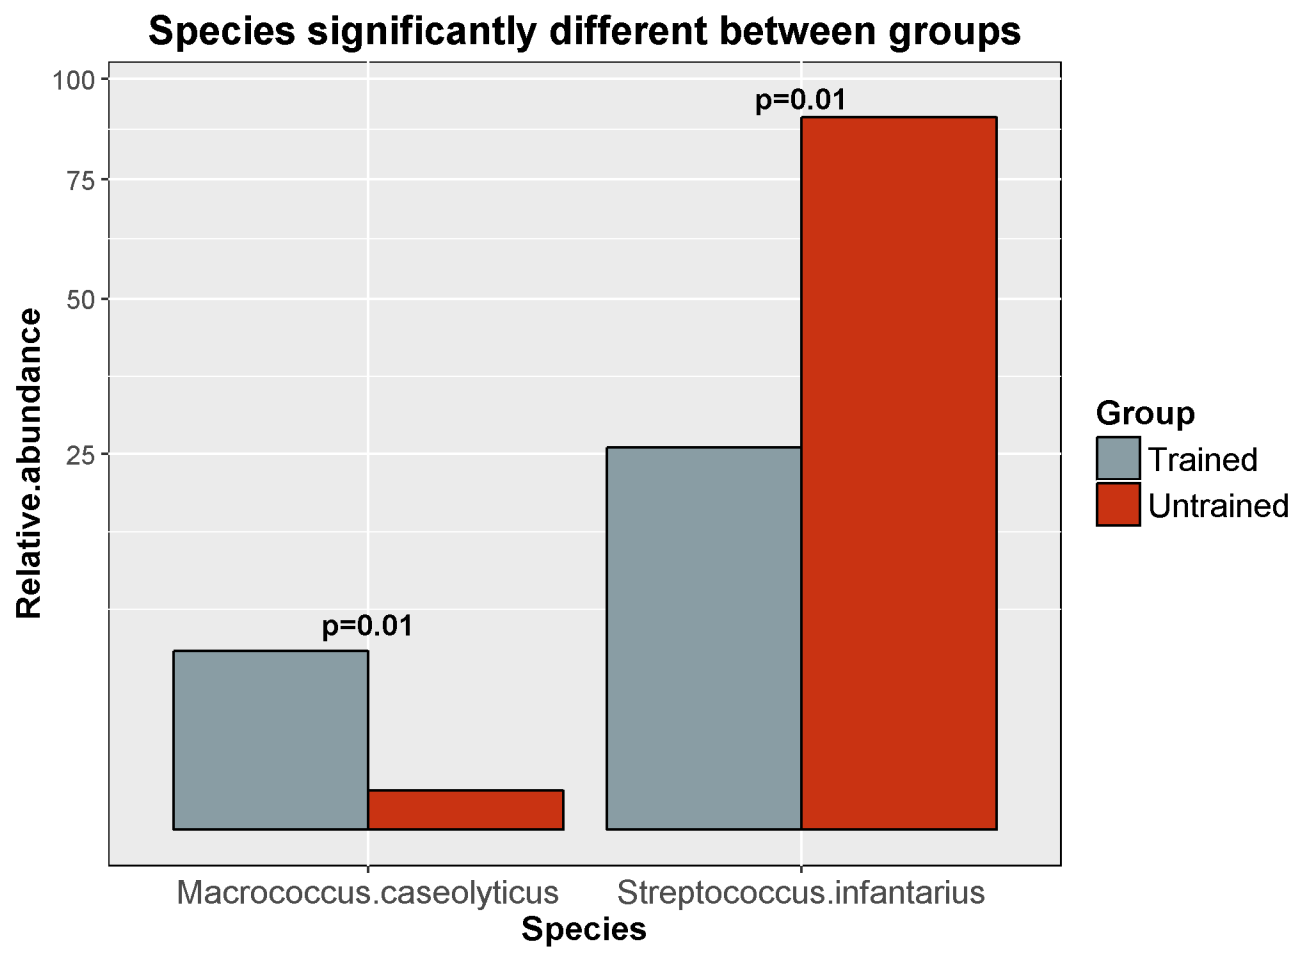

Figure S2. Bar plot showing species that were differentially abundant between nunu samples from trained producers and nunu samples from untrained producers.

Dissimilarity matrix based on HUMAnN2 output

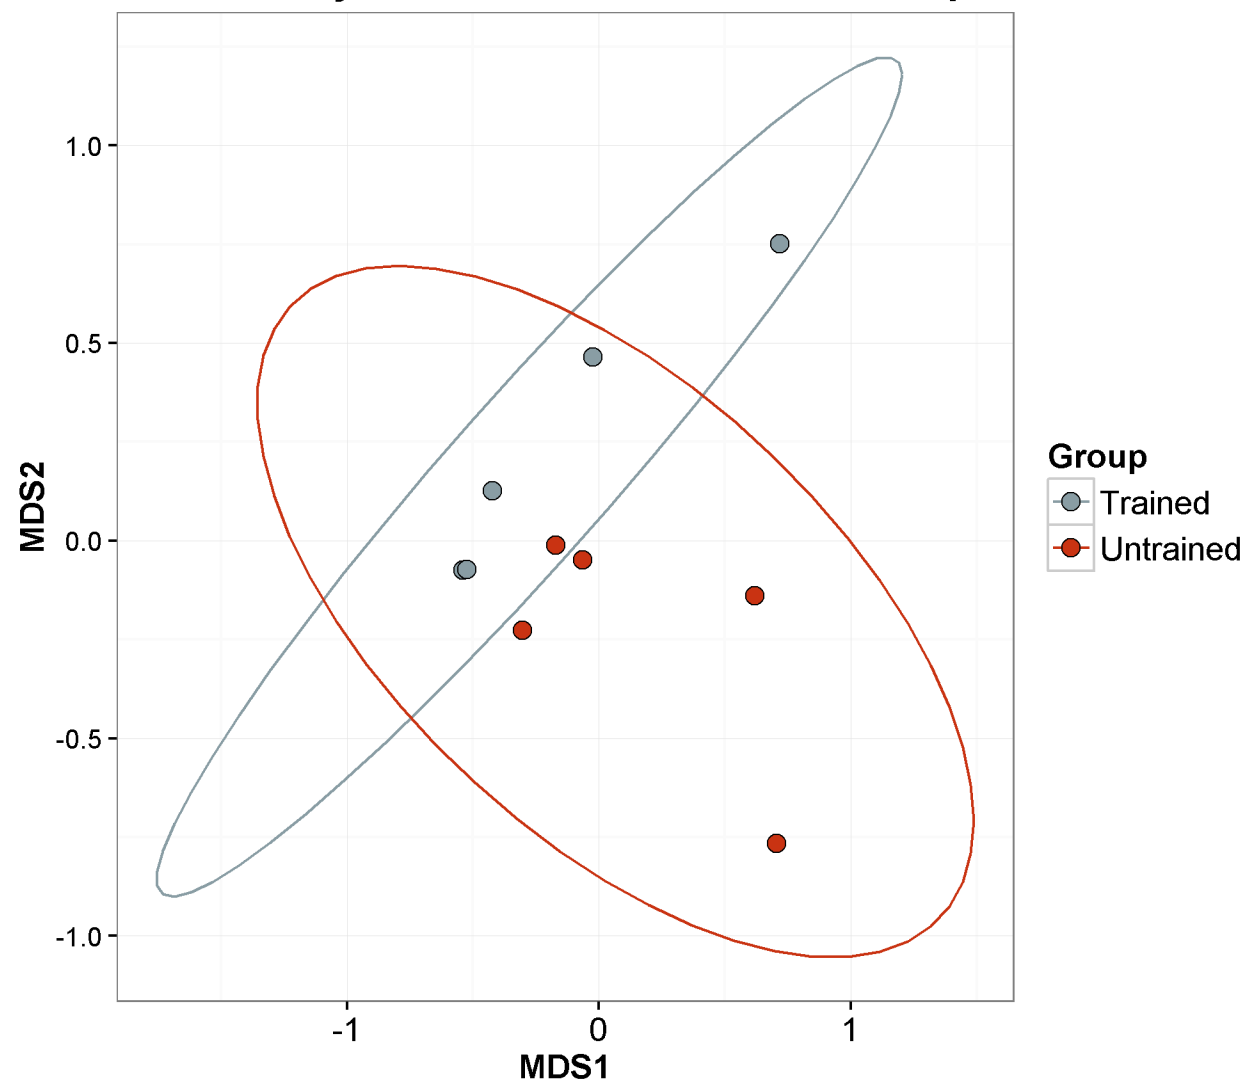

**Figure S3.** MDS plot showing the functional similarities between nunu samples from trained producers and nunu samples from untrained producers.

### Abundances of antibiotic resistance/HGT-related functions

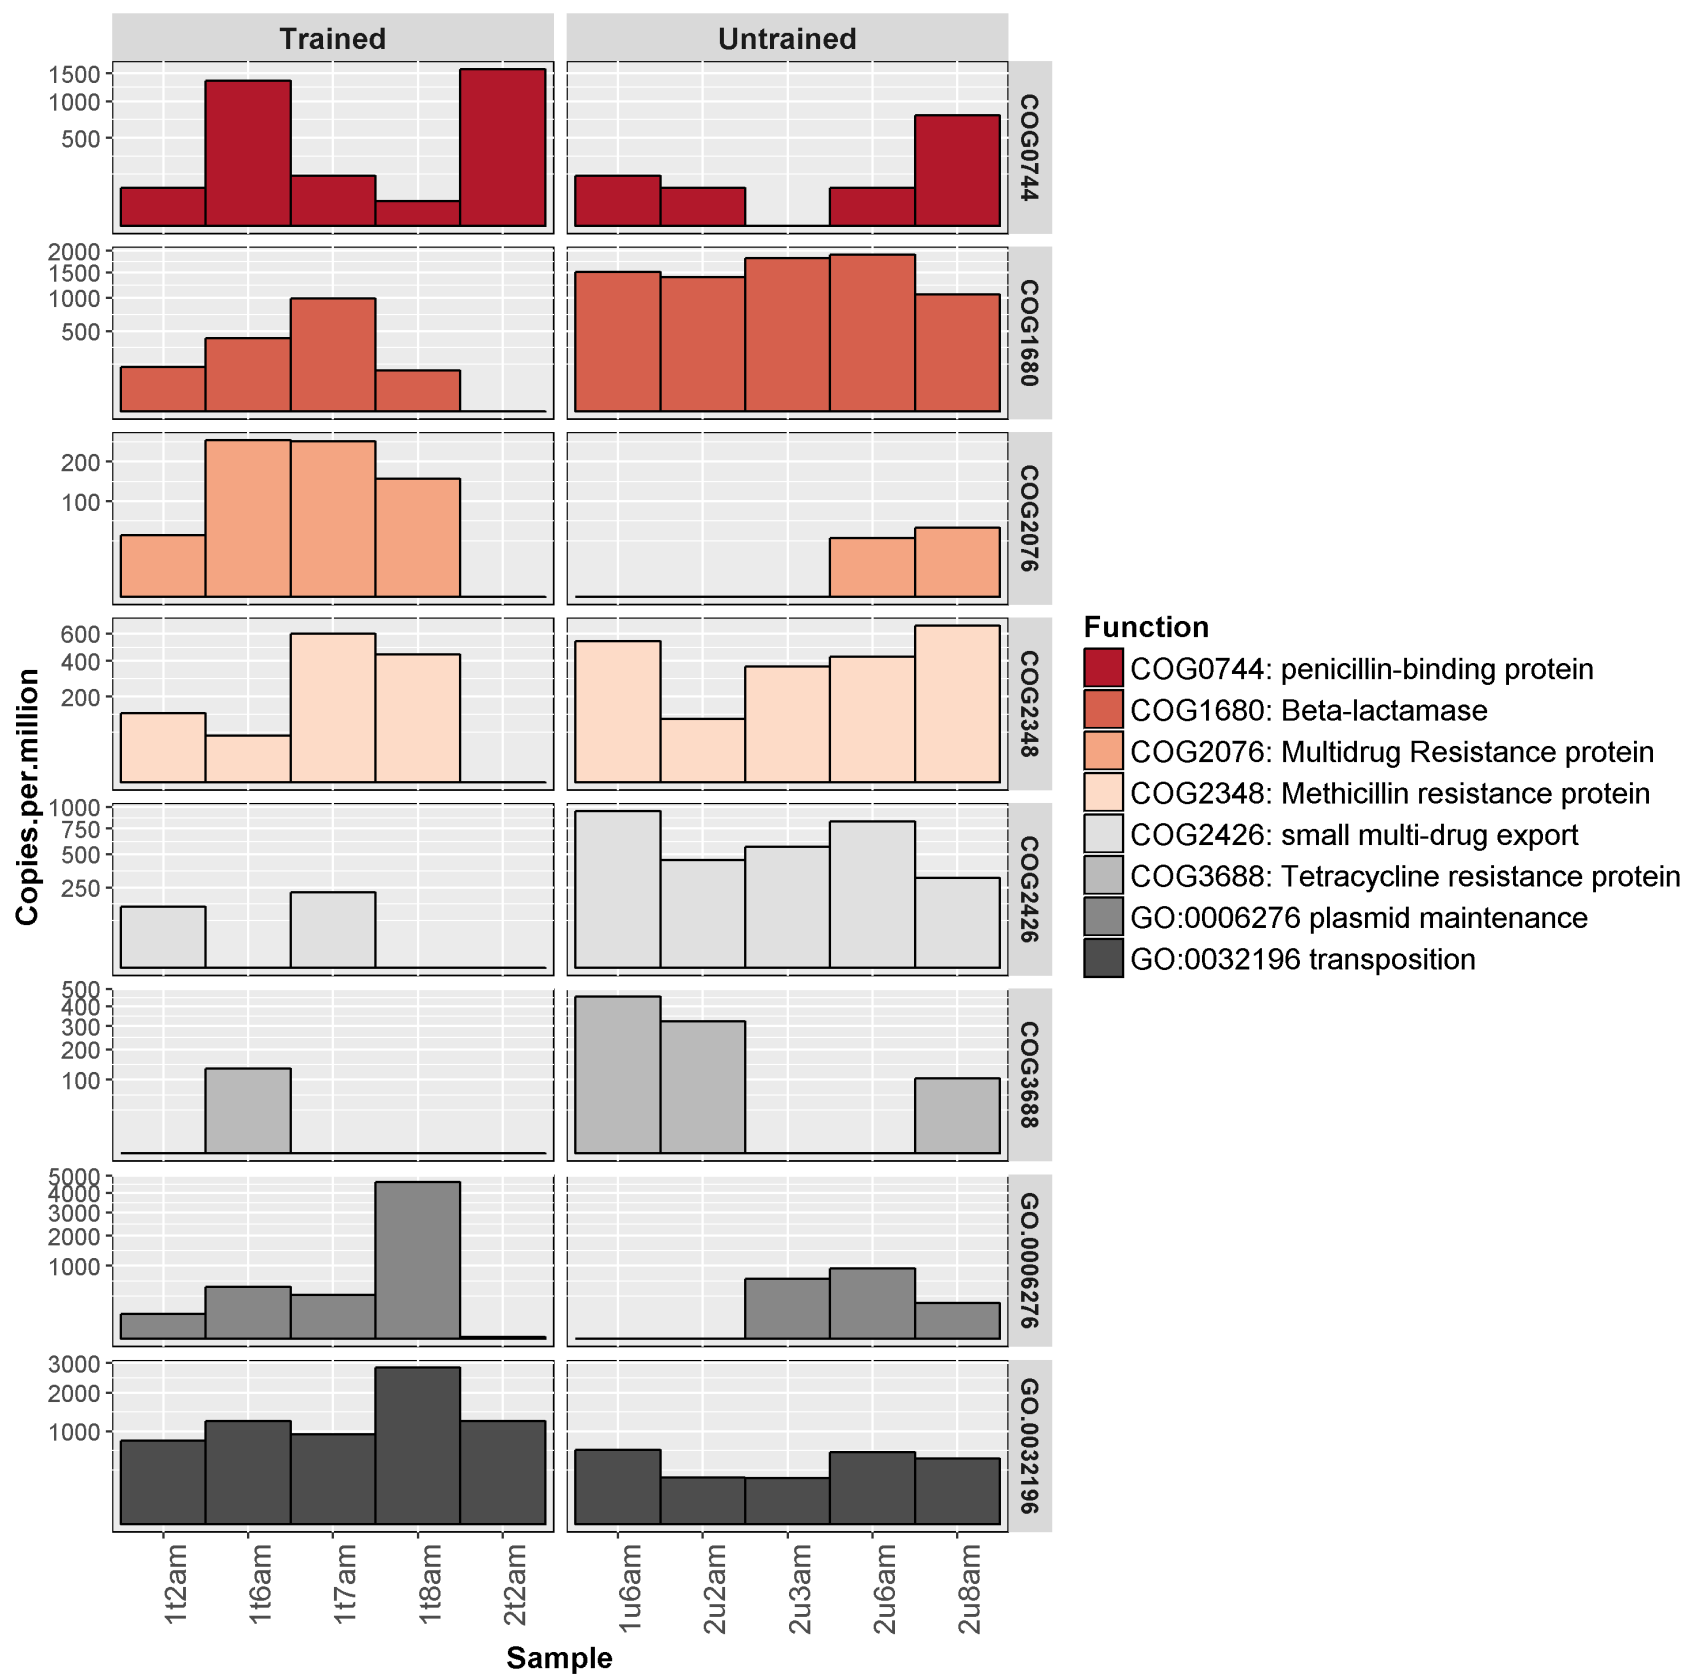

**Figure S4.** Bar plot showing the abundances of antibiotic resistance-associated functions and horizontal gene transfer (HGT)-associated functions in the nuNu metagenome.

**A Time taken to process nunu metagenome samples**

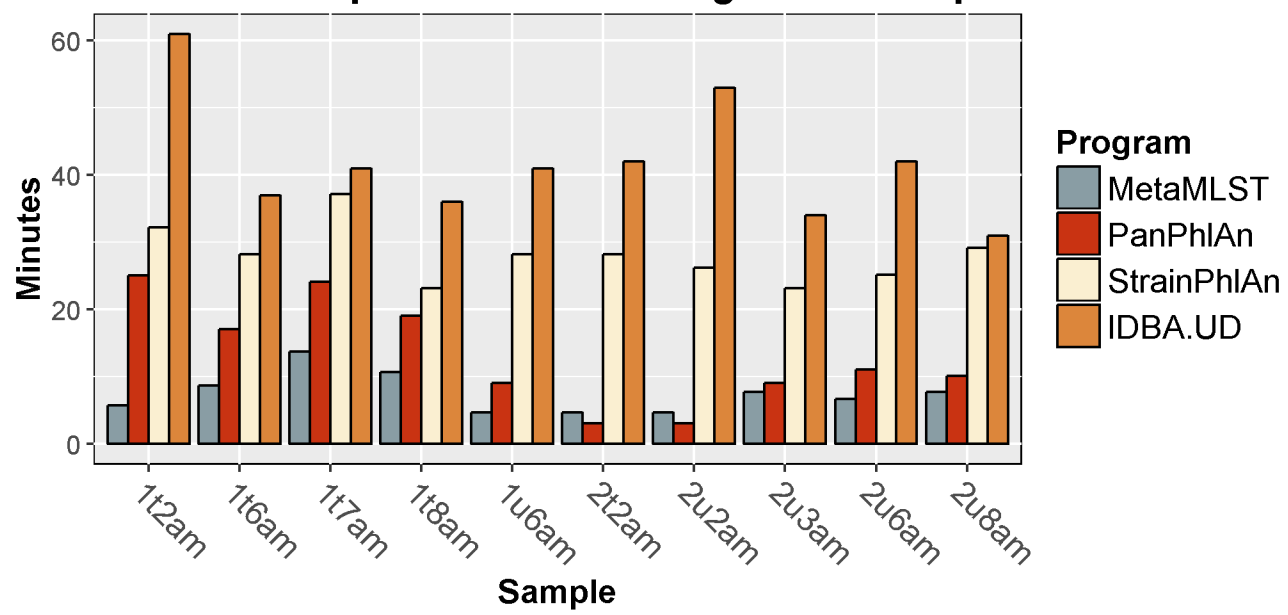

**B Mean time taken to process nunu metagenome samples**

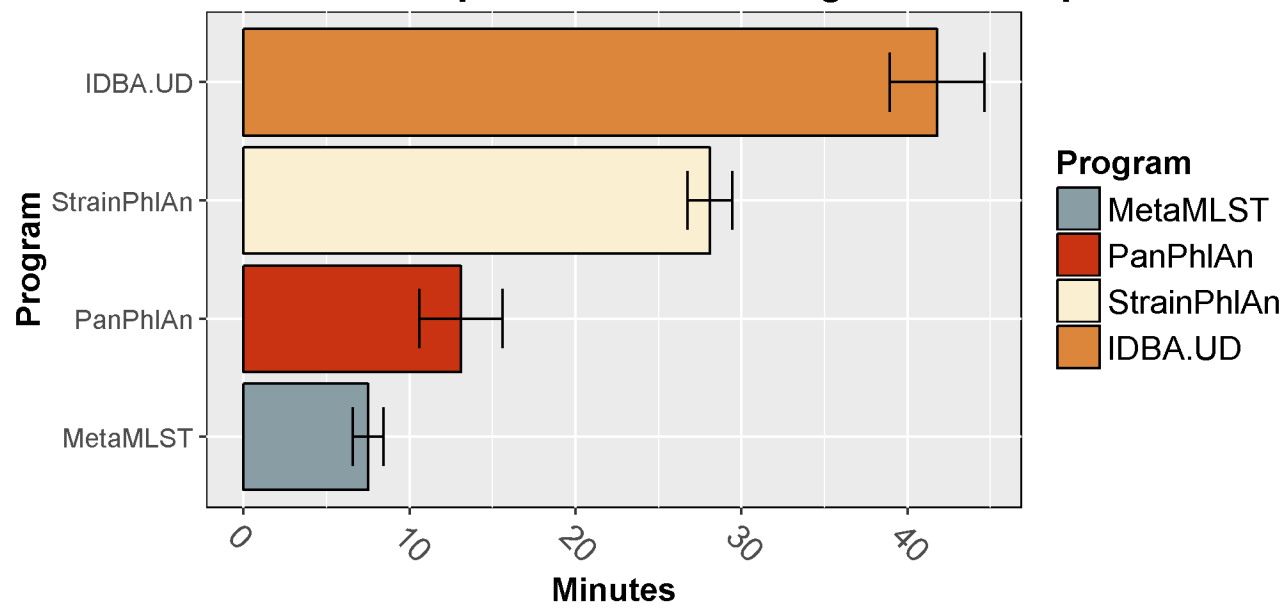

**Figure S5.** Bar plot showing (a) the total time taken to process nunu metagenomic samples, and (b) the mean time taken to process each nunu metagenomic sample, using IDBA-UD, MetaMLST, PanPhlAn and StrainPhlAn.

**Table S1.** MetaCyc pathways significantly different between groups.

| <b>MetaCyc pathway</b>                                                                     | <b>p-value (BH adjusted)</b> |
|--------------------------------------------------------------------------------------------|------------------------------|
| ALLANTOINDEG.PWY.superpathway.of.allantoin.degradation.in.yeast                            | 0.019                        |
| ARGSYNBSUB.PWY.L.arginine.biosynthesis.II.acetyl.cycle.                                    | 0.047                        |
| ARO.PWY.chorismate.biosynthesis.I                                                          | 0.047                        |
| ASPASN.PWY.superpathway.of.L.aspartate.and.L.asparagine.biosynthesis                       | 0.047                        |
| BRANCHED.CHAIN.AA.SYN.PWY.superpathway.of.branched.amino.acid.biosynthesis                 | 0.016                        |
| CALVIN.PWY.Calvin.Benson.Bassham.cycle                                                     | 0.009                        |
| COA.PWY.1.coenzyme.A.biosynthesis.II.mammalian.                                            | 0.047                        |
| COA.PWY.coenzyme.A.biosynthesis.I                                                          | 0.016                        |
| COMPLETE.ARO.PWY.superpathway.of.aromatic.amino.acid.biosynthesis                          | 0.047                        |
| DTDPRHAMSYN.PWY.dTDP.L.rhamnose.biosynthesis.I                                             | 0.047                        |
| GALACTUROCAT.PWY.D.galacturonate.degradation.I                                             | 0.009                        |
| GLUTORN.PWY.L.ornithine.biosynthesis                                                       | 0.047                        |
| GLYCOGENSYNTH.PWY.glycogen.biosynthesis.I.from.ADP.D.Glucose.                              | 0.016                        |
| HEME.BIOSYNTHESIS.II.heme.biosynthesis.I.aerobic.                                          | 0.028                        |
| HISDEG.PWY.L.histidine.degradation.I                                                       | 0.047                        |
| HISTSYN.PWY.L.histidine.biosynthesis                                                       | 0.028                        |
| HOMOSER.METSYN.PWY.L.methionine.biosynthesis.I                                             | 0.028                        |
| ILEUSYN.PWY.L.isoleucine.biosynthesis.I.from.threonine.                                    | 0.009                        |
| KDO.NAGLIPASYN.PWY.superpathway.of.Kdo.2.lipid.A.biosynthesis                              | 0.034                        |
| LACTOSECAT.PWY.lactose.and.galactose.degradation.I                                         | 0.009                        |
| NONOXIPENT.PWY.pentose.phosphate.pathway.non.oxidative.branch.                             | 0.047                        |
| P122.PWY.heterolactic.fermentation                                                         | 0.028                        |
| P161.PWY.acetylene.degradation                                                             | 0.009                        |
| PENTOSE.P.PWY.pentose.phosphate.pathway                                                    | 0.009                        |
| PEPTIDOGLYCANSYN.PWY.peptidoglycan.biosynthesis.I.meso.diaminopimelate.containing.         | 0.047                        |
| POLYISOPRENSYN.PWY.polyisoprenoid.biosynthesis.E.coli.                                     | 0.047                        |
| PWY.2942.L.lysine.biosynthesis.III                                                         | 0.016                        |
| PWY.3001.superpathway.of.L.isoleucine.biosynthesis.I                                       | 0.028                        |
| PWY.4242.pantothenate.and.coenzyme.A.biosynthesis.III                                      | 0.047                        |
| PWY.5097.L.lysine.biosynthesis.VI                                                          | 0.016                        |
| PWY.5100.pyruvate.fermentation.to.acetate.and.lactate.II                                   | 0.028                        |
| PWY.5103.L.isoleucine.biosynthesis.III                                                     | 0.016                        |
| PWY.5104.L.isoleucine.biosynthesis.IV                                                      | 0.034                        |
| PWY.5173.superpathway.of.acetyl.CoA.biosynthesis                                           | 0.009                        |
| PWY.5265.peptidoglycan.biosynthesis.II.staphylococci.                                      | 0.016                        |
| PWY.5384.sucrose.degradation.IV.sucrose.phosphorylase.                                     | 0.016                        |
| PWY.5686.UMP.biosynthesis                                                                  | 0.028                        |
| PWY.5747.2.methylcitrate.cycle.II                                                          | 0.016                        |
| PWY.5850.superpathway.of.menaquinol.6.biosynthesis.I                                       | 0.047                        |
| PWY.5860.superpathway.of.demethylmenaquinol.6.biosynthesis.I                               | 0.047                        |
| PWY.5913.TCA.cycle.VI.obligate.autotrophs.                                                 | 0.009                        |
| PWY.5973.cis.vaccenate.biosynthesis                                                        | 0.009                        |
| PWY.6124.inosine.5.phosphate.biosynthesis.II                                               | 0.009                        |
| PWY.6125.superpathway.of.guanosine.nucleotides.de.novo.biosynthesis.II                     | 0.016                        |
| PWY.6147.6.hydroxymethyl.dihydropterin.diphosphate.biosynthesis.I                          | 0.047                        |
| PWY.6163.chorismate.biosynthesis.from.3.dehydroquinone                                     | 0.028                        |
| PWY.6168.flavin.biosynthesis.III.fungi.                                                    | 0.047                        |
| PWY.621.sucrose.degradation.III.sucrose.invertase.                                         | 0.009                        |
| PWY.6282.palmitoleate.biosynthesis.I.from.5Z.dodec.5.enoate.                               | 0.047                        |
| PWY.6385.peptidoglycan.biosynthesis.III.mycobacteria.                                      | 0.028                        |
| PWY.6386.UDP.N.acetylmuramoyl.pentapeptide.biosynthesis.II.lysine.containing.              | 0.028                        |
| PWY.6387.UDP.N.acetylmuramoyl.pentapeptide.biosynthesis.I.meso.diaminopimelate.containing. | 0.028                        |
| PWY.6507.4.deoxy.L.threo.hex.4.enopyranuronate.degradation                                 | 0.009                        |
| PWY.6527.stachyose.degradation                                                             | 0.009                        |
| PWY.6901.superpathway.of.glucose.and.xylose.degradation                                    | 0.028                        |
| PWY.6936.seleno.amino.acid.biosynthesis                                                    | 0.009                        |
| PWY.7111.pyruvate.fermentation.to.isobutanol.engineered.                                   | 0.009                        |
| PWY.7115.C4.photosynthetic.carbon.assimilation.cycle.NAD.ME.type                           | 0.047                        |
| PWY.7184.pyrimidine.deoxyribonucleotides.de.novo.biosynthesis.I                            | 0.028                        |
| PWY.7187.pyrimidine.deoxyribonucleotides.de.novo.biosynthesis.II                           | 0.047                        |
| PWY.7197.pyrimidine.deoxyribonucleotide.phosphorylation                                    | 0.047                        |
| PWY.7199.pyrimidine.deoxyribonucleosides.salvage                                           | 0.009                        |
| PWY.7200.superpathway.of.pyrimidine.deoxyribonucleoside.salvage                            | 0.015                        |
| PWY.7208.superpathway.of.pyrimidine.nucleobases.salvage                                    | 0.047                        |
| PWY.7228.superpathway.of.guanosine.nucleotides.de.novo.biosynthesis.I                      | 0.016                        |
| PWY.7242.D.fructuronate.degradation                                                        | 0.047                        |
| PWY.7357.thiamin.formation.from.pyrithiamine.and.oxythiamine.yeast.                        | 0.009                        |
| PWY.7539.6.hydroxymethyl.dihydropterin.diphosphate.biosynthesis.III.Chlamydia.             | 0.047                        |

|                                                                       |       |
|-----------------------------------------------------------------------|-------|
| PWY.7663.gondoate.biosynthesis.anaerobic.                             | 0.009 |
| PWY0.1061.superpathway.of.L.alanine.biosynthesis                      | 0.047 |
| PWY0.1296.purine.ribonucleosides.degradation                          | 0.009 |
| PWY0.1297.superpathway.of.purine.deoxyribonucleosides.degradation     | 0.009 |
| PWY0.1298.superpathway.of.pyrimidine.deoxyribonucleosides.degradation | 0.047 |
| PWY0.1319.CDP.diacylglycerol.biosynthesis.II                          | 0.009 |
| PWY0.42.2.methylcitrate.cycle.I                                       | 0.016 |
| PWY66.409.superpathway.of.purine.nucleotide.salvage                   | 0.009 |
| PWY66.422.D.galactose.degradation.V.Leloir.pathway.                   | 0.047 |
| RHAMCAT.PWY.L.rhamnose.degradation.I                                  | 0.047 |
| SER.GLYSYN.PWY.superpathway.of.L.serine.and.glycine.biosynthesis.I    | 0.047 |
| THRESYN.PWY.superpathway.of.L.threonine.biosynthesis                  | 0.028 |
| TRPSYN.PWY.L.tryptophan.biosynthesis                                  | 0.009 |
| VALSYN.PWY.L.valine.biosynthesis                                      | 0.009 |
| X1CMET2.PWY.N10.formyl.tetrahydrofolate.biosynthesis                  | 0.016 |

---



**Table S2.** The results of PanPhlAn analysis of 17 spinach samples spiked with different STEC.

| Sequence accession number | Strain                                 | <i>E. coli</i> abundance (%) | stx1A | stx1B | stx2A | stx2B |
|---------------------------|----------------------------------------|------------------------------|-------|-------|-------|-------|
| SRR4101289                | <i>E. coli</i> O157:H7 str. Sakai      | 89.73                        | 1     | 1     | 1     | 1     |
| SRR4101293                | <i>E. coli</i> O157:H7 str. TW14359    | 79.9                         | 1     | 1     | 1     | 1     |
| SRR4101297                | <i>E. coli</i> O157:H7 str. TW14359    | 42.74                        | 0     | 0     | 1     | 1     |
| SRR4101299                | <i>E. coli</i> O113:H21 str. CL-3      | 45.7                         | 0     | 0     | 1     | 1     |
| SRR4101303                | <i>E. coli</i> O113:H21 str. CL-3      | 68.17                        | 1     | 1     | 0     | 0     |
| SRR4101307                | <i>E. coli</i> serovar O145:H28        | 92.98                        | 0     | 0     | 1     | 1     |
| SRR4101308                | <i>E. coli</i> serovar O121:H19        | 92.14                        | 0     | 0     | 1     | 1     |
| SRR4101310                | <i>E. coli</i> EC1738                  | 60.59                        | 0     | 0     | 1     | 1     |
| SRR4101311                | <i>E. coli</i> EC1738                  | 87.5                         | 0     | 0     | 1     | 1     |
| SRR4101312                | <i>E. coli</i> O104:H4 str. 2011C-3493 | 80.43                        | 0     | 0     | 1     | 1     |
| SRR4101314                | <i>E. coli</i> O104:H4 str. 2011C-3493 | 66.08                        | 0     | 0     | 1     | 1     |
| SRR4101315                | <i>E. coli</i> serovar O104:H7         | 89.98                        | 0     | 0     | 1     | 1     |
| SRR4101317                | <i>E. coli</i> serovar O145:H28        | 20.56                        | 0     | 0     | 1     | 1     |
| SRR4101318                | <i>E. coli</i> STEC_B2F1               | 38.67                        | 0     | 0     | 1     | 1     |
| SRR4101319                | <i>E. coli</i> STEC_B2F1               | 56.95                        | 0     | 0     | 1     | 1     |
| SRR4101321                | <i>E. coli</i> O113:H21 str. CL-3      | 92.83                        | 0     | 0     | 1     | 1     |
| SRR4101323                | <i>E. coli</i> O113:H21 str. CL-3      | 76.2                         | 0     | 0     | 1     | 1     |

**Table S3.** *Escherichia coli* reference genomes used in this study.

| <b><i>Escherichia coli</i> strain</b> | <b>RefSeq assembly accession</b> |
|---------------------------------------|----------------------------------|
| RM13514                               | GCF_000520035                    |
| ST540                                 | GCF_000599625                    |
| ST2747                                | GCF_000599685                    |
| RM12761                               | GCF_000662395                    |
| RM12581                               | GCF_000671295                    |
| BIDMC 59                              | GCF_000692395                    |
| BIDMC 74                              | GCF_000692575                    |
| CHS 77                                | GCF_000692735                    |
| SE11                                  | GCF_000010385                    |
| SE15                                  | GCF_000010485                    |
| UTI89                                 | GCF_000013265                    |
| 536                                   | GCF_000013305                    |
| APEC O1                               | GCF_000014845                    |
| E24377A                               | GCF_000017745                    |
| ATCC 8739                             | GCF_000019385                    |
| SMS-3-5                               | GCF_000019645                    |
| DH1                                   | GCF_000023365                    |
| BL21-Gold(DE3)pLysS AG                | GCF_000023665                    |
| IAI1                                  | GCF_000026265                    |
| S88                                   | GCF_000026285                    |
| UMN026                                | GCF_000026325                    |
| 042                                   | GCF_000027125                    |
| KO11                                  | GCF_000147855                    |
| ABU 83972                             | GCF_000148365                    |
| UM146                                 | GCF_000148605                    |
| MS 45-1                               | GCF_000164295                    |
| TA280                                 | GCF_000176655                    |
| MS 145-7                              | GCF_000179115                    |
| W                                     | GCF_000184185                    |
| LT-68                                 | GCF_000188815                    |
| E1167                                 | GCF_000190795                    |
| 1.2741                                | GCF_000194175                    |
| 3003                                  | GCF_000194665                    |
| TW07793                               | GCF_000194685                    |
| UMNK88                                | GCF_000212715                    |
| 96.0497                               | GCF_000215185                    |
| 9.0111                                | GCF_000215265                    |
| UMNF18                                | GCF_000220005                    |
| STEC_DG131-3<br>clone D i14           | GCF_000225125                    |
| B093                                  | GCF_000233895                    |
| DEC2D                                 | GCF_000242015                    |
| P12b                                  | GCF_000249215                    |
| KO11FL                                | GCF_000257275                    |
| W                                     | GCF_000258025                    |
| P4                                    | GCF_000258145                    |
| APEC O78                              | GCF_000259425                    |
| KTE193                                | GCF_000332755                    |
| KTE233                                | GCF_000351025                    |
| KTE233                                | GCF_000351325                    |
| KTE56                                 | GCF_000351525                    |
| KTE66                                 | GCF_000351625                    |
| KTE67                                 | GCF_000351645                    |
| KTE17                                 | GCF_00035185                     |
| KTE42                                 | GCF_000352125                    |
| KTE29                                 | GCF_000352185                    |
| KTE79                                 | GCF_000352245                    |
| KTE84                                 | GCF_000352445                    |
| KTE84                                 | GCF_000352465                    |
| KTE115                                | GCF_000352525                    |
| KTE135                                | GCF_000352585                    |
| KTE141                                | GCF_000352645                    |
| KTE144                                | GCF_000352665                    |
| KTE146                                | GCF_000352685                    |
| KTE147                                | GCF_000352705                    |
| KTE154                                | GCF_000352725                    |
| KTE192                                | GCF_000352785                    |
| KTE184                                | GCF_000352885                    |
| KTE183                                | GCF_000352905                    |
| KTE196                                | GCF_000352925                    |
| KTE197                                | GCF_000352945                    |

|                     |               |
|---------------------|---------------|
| KTE218              | GCF_000353105 |
| 2720900             | GCF_000355175 |
| KTE114              | GCF_000407765 |
| KTE19               | GCF_000407825 |
| KTE31               | GCF_000407925 |
| KTE98               | GCF_000408545 |
| KTE102              | GCF_000408585 |
| HVH 55 (4-2646161)  | GCF_000456825 |
| HVH 58 (4-2839709)  | GCF_000456865 |
| HVH 65 (4-2262045)  | GCF_000456945 |
| HVH 111 (4-7039018) | GCF_000457555 |
| HVH 115 (4-4465989) | GCF_000457655 |
| HVH 139 (4-3192644) | GCF_000458035 |
| HVH 164 (4-5953081) | GCF_000458495 |
| HVH 188 (4-2356988) | GCF_000458825 |
| HVH 195 (3-7155360) | GCF_000458955 |
| KOEGE 44 (106a)     | GCF_000459715 |
| UMEA 3052-1         | GCF_000460035 |
| UMEA 3087-1         | GCF_000460095 |
| UMEA 3124-1         | GCF_000460255 |
| UMEA 3144-1         | GCF_000460315 |
| UMEA 3150-1         | GCF_000460335 |
| UMEA 3152-1         | GCF_000460375 |
| UMEA 3200-1         | GCF_000460735 |
| UMEA 3212-1         | GCF_000460835 |
| UMEA 3271-1         | GCF_000461115 |
| UMEA 3718-1         | GCF_000461675 |
| UMEA 4076-1         | GCF_000461855 |
| BIDMC 19C           | GCF_000474825 |
| JJ1886              | GCF_000493755 |
| HVH 36 (4-5675286)  | GCF_000494935 |
| K-12 substr. MG1655 | GCF_000005845 |
| 12009               | GCF_000010745 |
| 2009EL-2050         | GCF_000299255 |
| 2009EL-2071         | GCF_000299475 |
| 2011C-3493          | GCF_000299455 |
| 11128               | GCF_000010765 |
| E2348/69            | GCF_000026545 |
| E24377A             | GCF_000017745 |
| EC4115              | GCF_000021125 |
| EDL933              | GCF_000732965 |
| Sakai               | GCF_000008865 |
| TW14359             | GCF_000022225 |
| Xuzhou21            | GCF_000262125 |
| 11368               | GCF_000091005 |
| CB9615              | GCF_000025165 |
| RM12579             | GCF_000245515 |
| CE10                | GCF_000227625 |
| NRG 857C            | GCF_000183345 |
| 55989               | GCF_000026245 |
| ETEC H10407         | GCF_000210475 |

---

**Table S4.** *Klebsiella pneumoniae* reference genomes used in this study.

| <b><i>Klebsiella pneumoniae</i> strain</b> | <b>RefSeq assembly accession</b> |
|--------------------------------------------|----------------------------------|
| HS11286                                    | GCF_000240185                    |
| NTUH-K2044                                 | GCF_000009885                    |
| KCTC 2242                                  | GCF_000220485                    |
| Kp13                                       | GCF_000512165                    |
| KPNIH31                                    | GCF_000785005                    |
| 234-12                                     | GCF_000981845                    |
| DHQP1002001                                | GCF_001704235                    |
| Kp_Goe_154414                              | GCF_001902335                    |
| ATCC 13884                                 | GCF_000163455                    |
| LCT-KP214                                  | GCF_000255975                    |
| WGLW1                                      | GCF_000300655                    |
| WGLW2                                      | GCF_000300675                    |
| KpQ3                                       | GCF_000300835                    |
| WGLW5                                      | GCF_000300955                    |
| 909957                                     | GCF_000485755                    |
| BIDMC 40                                   | GCF_000492215                    |
| BIDMC 36                                   | GCF_000492295                    |
| BIDMC 25                                   | GCF_000492315                    |
| BIDMC 24                                   | GCF_000492335                    |
| BIDMC 23                                   | GCF_000492355                    |
| UCICRE 14                                  | GCF_000492415                    |
| UCICRE 7                                   | GCF_000492535                    |
| BWH 30                                     | GCF_000492695                    |
| BWH 28                                     | GCF_000492735                    |
| MGH 44                                     | GCF_000492795                    |
| MGH 43                                     | GCF_000567685                    |
| XDR                                        | GCF_000785625                    |
| KP-7                                       | GCF_000406385                    |
| ATCC 25955                                 | GCF_000409715                    |
| CCBH13327                                  | GCF_000805735                    |
| -                                          | GCF_000821685                    |
| ATCC 11296                                 | GCF_000826585                    |
| 50531633                                   | GCF_001462885                    |
| YMC2010/8/B2027                            | GCA_001901745                    |
| 12-3578                                    | GCF_000367165                    |
| 1183_KPNE                                  | GCF_001060495                    |
| 570_KPNE                                   | GCF_001063755                    |
| k414                                       | GCF_900085035                    |
| k2254                                      | GCF_900085435                    |
| W2-15-ERG3                                 | GCF_900093395                    |
